# Supplementary material
Source: publisher figshare collection journal article supplement (https://acs.figshare.com/ndownloader/files/15136742)
Supplement: Supplementary file 1 [file 15136742]

## Sheet: Sheet1
Table S5. Comprehensive list of differentially expressed genes following a dose-response behavior relative to BAA concentration.
Gene	Annotation	Up/down regulation	p-value
ACIAD1154	putative transport protein	↑	9.94e-20
ACIAD1155	2%2C4-dienoyl-CoA reductase [NADPH] (2%2C4-dienoyl coenzyme A reductase)	↑	1.34e-18
ACIAD2759	putative transcriptional regulator (GntR family)	↑	4.24e-16
ACIAD2758	methylisocitrate lyase	↑	8.29e-16
ACIAD2755	putative methyl-cis-aconitic acid hydratase (AcnM)	↑	5.99e-16
ACIAD2756	methylcitrate synthase (citrate synthase 2)	↑	1.2e-14
ACIAD1152	putative transcriptional regulator	↑	1.32e-17
ACIADrnpBRNA	RNA component of the ribonuclease P	↑	0.00323442
ACIAD0195	putative transporter (MFS superfamily)	↑	2.74e-09
ACIAD2250	alkyl hydroperoxide reductase subunit%2C FAD/NAD(P)-binding%2C detoxification of hydroperoxides	↑	7.63e-05
ACIAD1234	alkyl hydroperoxide reductase subunit%2C FAD/NAD(P)-binding%2C detoxification of hydroperoxides	↑	5.66e-05
ACIAD1284	succinylornithine transaminase (also has acetylornitine transaminase activity%2C PLP-dependent) (carbon starvation protein C)	↑	2.39e-05
ACIAD3264	conserved hypothetical protein	↑	0.00190953
ACIAD0436	alkyl hydroperoxide reductase%2C C22 subunit%2C thioredoxin-like%2C detoxification of hydroperoxides	↑	0.000440027
ACIAD1287	succinylglutamic semialdehyde dehydrogenase	↑	4.32e-05
ACIAD1286	arginine succinyltransferase	↑	6.85e-06
ACIAD1280	putative Cyanophycinase (CphI)	↑	0.000163018
ACIAD3672	conserved hypothetical protein%3B putative membrane protein	↑	5.93e-05
ACIAD2586	putative serine protease	↑	0.00141319
ACIAD2074	conserved hypothetical protein%3B putative signal peptide	↑	7.7e-05
ACIAD1288	succinylarginine dihydrolase	↑	6.71e-05
ACIAD3128	putative oxidoreductase	↑	6.13e-08
ACIAD2926	conserved hypothetical protein	↑	0.00417065
ACIAD1281	hypothetical protein	↑	2.72e-05
ACIAD1289	succinylglutamate desuccinylase	↑	4.57e-05
ACIAD0196	putative regulator (TetR/AcrR family)	↑	1.04e-07
ACIAD1282	conserved hypothetical protein	↑	3.26e-05
ACIAD3080	pyridine nucleotide transhydrogenase (proton pump)%2C alpha subunit (part1)	↑	1.03e-05
ACIAD3078	pyridine nucleotide transhydrogenase%2C beta subunit	↑	6.32e-07
ACIAD2453	conserved hypothetical protein	↑	0.00295403
ACIAD0610	conserved hypothetical protein%3B putative membrane protein	↑	9.33e-05
ACIAD2565	glyceraldehyde-3-phosphate dehydrogenase	↑	2.69e-07
ACIAD0462	conserved hypothetical protein	↑	0.000429359
ACIAD3157	putative lytic murein transglycosylase%2C soluble (Slt)	↑	0.000753669
ACIAD1173	putative nodulin 21-related protein	↑	1.37e-05
ACIAD2569	excinuclease ABC subunit B (uvrB) (ATP-dependent DNA excision repair enzyme UvrAC)	↑	0.000376814
ACIAD2842	phosphoenolpyruvate carboxykinase [GTP] (PEP carboxykinase) (PEPCK)	↑	2.89e-06
ACIAD1229	lipoprotein precursor	↑	0.000345643
ACIAD0553	putative glycosyl transferase	↑	4.37e-05
ACIAD1232	conserved hypothetical protein%3B putative glutaredoxin-related protein	↑	0.000131521
ACIAD0734	NADH dehydrogenase I chain E	↑	0.000916972
ACIAD0756	putative transporter (MFS superfamily)	↑	0.0026253
ACIAD2841	conserved hypothetical protein	↑	0.000361717
ACIAD3345	conserved hypothetical protein%3B putative membrane protein	↑	0.00116312
ACIAD0194	putative transcriptional regulator (AraC family)	↑	1.81e-06
ACIAD2937	outer-membrane lipoproteins carrier protein	↑	0.000347259
ACIAD1172	conserved hypothetical protein%3B putative 2-hydroxychromene-2-carboxylate isomerase protein	↑	0.00337484
ACIAD2298	putative zinc protease	↑	0.00109128
ACIAD0119	putative major fimbrial subunit protein precursor	↑	0.00248075
ACIAD0915	conserved hypothetical protein%3B putative transglutaminase-like enzyme	↑	0.000650763
ACIAD3612	putative alcohol dehydrogenase	↑	0.00104933
ACIAD0197	putative membrane protein	↑	2.46e-05
ACIAD0010	putative chaperone involved in Fe-S cluster assembly and activation (HesB-like)	↑	0.000207349
ACIAD3104	acetolactate synthase III%2C large subunit	↑	9.45e-06
ACIAD1876	glycine cleavage complex protein H%2C carrier of aminomethyl moiety via covalently bound lipoyl cofactor	↑	0.00287786
ACIAD3176	conserved hypothetical protein%3B putative sensory transduction histidine kinase	↑	0.000802556
ACIAD1641	hypothetical protein	↑	0.000894458
ACIAD2641	transport protein of outer membrane lipoproteins (ABC superfamily%2C membrane)	↑	0.00218798
ACIAD0648	preprotein translocase%2C secretion protein of IISP family	↑	0.000303779
ACIAD1389	30S ribosomal protein S20	↑	0.00165864
ACIAD1052	putative membrane-bound protein in GNT I transport system (GntY)	↑	2.63e-05
ACIAD0861	putative ribosomal large subunit pseudouridine synthase B (Pseudouridylate synthase) (Uracil hydrolyase)	↑	1.94e-06
ACIADtRNAAla_69	tRNA-Ala	↑	0.00234692
ACIAD1211	L-2%2C4-diaminobutyrate decarboxylase	↑	0.000983089
ACIAD0551	beta-N-acetyl-D-glucosaminidase	↑	0.000216489
ACIAD2650	conserved hypothetical protein%3B putative membrane protein	↑	0.00113161
ACIAD1405	repressor of the iscRSUA operon%2C involved in assembly of Fe-S clusters	↑	0.00064552
ACIAD3530	esterase precursor	↑	0.00182338
ACIAD2622	tolerance to colicins E2%2C E%2C A%2C and K%2C required for OM integrity	↑	0.00202331
ACIAD0237	conserved hypothetical protein%3B putative membrane protein	↑	1.16e-05
ACIAD1879	Alcohol dehydrogenase class 3 (S-(hydroxymethyl)glutathione dehydrogenase)	↑	2.47e-05
ACIAD3341	putative arginine/lysine/ornithine decarboxylase	↑	2.55e-05
ACIAD0356	conserved hypothetical protein	↑	0.00294892
ACIAD3633	NADH dehydrogenase II	↑	0.002699
ACIAD0974	putative acetyltransferase	↑	0.000467521
ACIAD2627	putative RNA polymerase sigma factor	↑	0.00282109
ACIAD2862	transcription elongation factor%2C cleaves 3' nucleotide of paused mRNA	↑	0.000599389
ACIAD2981	putative oxidoreductase involved in sulfite reduction	↑	0.000130188
ACIAD2866	putative hemagglutinin/hemolysin-related protein	↑	0.00019394
ACIAD0011	Anhydro-N-acetylmuramic acid kinase (AnhMurNAc kinase)	↑	0.000395236
ACIAD0223	shikimate and dehydroshikimate transport protein (MFS superfamily)	↑	0.000188545
ACIAD0806	conserved hypothetical protein%3B putative esterase of the alpha-beta hydrolase superfamily	↑	0.000839859
ACIAD3041	phenylalanyl-tRNA synthetase%2C beta subunit	↑	0.00100369
ACIAD0709	putative FMN oxidoreductase	↑	0.00402933
ACIAD0552	carboxy-terminal protease for penicillin-binding protein	↑	0.00128846
ACIAD3120	conserved hypothetical protein	↑	0.00139372
ACIAD1459	hypothetical protein%3B putaive membrane protein	↑	0.000866276
ACIAD2854	cell division protein (filamentous temperature sensitivity 23S rRNA U2552 ribose 2'-O-methyltransferase SAM-dependent)	↑	0.00351717
ACIAD1134	esterase	↑	0.00217248
ACIAD2623	peptidoglycan-associated lipoprotein precursor	↑	0.00130212
ACIAD3145	putative pyridine nucleotide-disulfide oxidoreductase%2C class I	↑	0.00368289
ACIAD0939	putative hemolysin activator protein	↑	0.00238899
ACIAD0535	ATP-dependent Clp protease ATP-binding subunit	↑	0.0014453
ACIAD0923	delta-aminolevulinic acid dehydratase (Porphobilinogen synthase)	↑	0.00313478
ACIAD2574	aspartate aminotransferase A	↑	0.000581524
ACIAD3177	conserved hypothetical protein%3B putative conserved domain	↑	0.00045101
ACIAD2403	conserved hypothetical protein%3B putative outer membrane protein	↑	0.00357316
ACIAD0324	conserved hypothetical protein	↑	0.00341321
ACIAD0645	conserved hypothetical protein	↑	0.0044226
ACIAD3276	hypothetical protein%3B putative signal peptide	↑	0.0014913
ACIAD0735	NADH dehydrogenase I chain F	↑	0.000149137
ACIAD0112	tyrosine aminotransferase%2C tyrosine repressible%2C PLP-dependent	↑	0.00121238
ACIAD0921	conserved hypothetical protein%3B putative nucleoside-diphosphate sugar epimerases (SulA family)	↑	0.0027244
ACIAD3533	conserved hypothetical protein%3B putative signal peptide	↑	0.00137625
ACIAD1248	RNAse HII	↑	0.0021401
ACIAD3518	glutathione synthetase	↑	0.000123158
ACIAD3015	stringent starvation protein B	↑	0.00288339
ACIAD0424	putative type III effector HopPmaJ	↑	0.00378987
ACIAD3102	acetohydroxy acid isomeroreductase	↑	0.00337667
ACIAD0262	D-alanyl-D-alanine endopeptidase%2C penicillin-binding protein 7 and penicillin-binding protein 8	↑	0.00338214
ACIAD2421	putative diguanylate cyclase/phosphodiesterase	↑	0.000679688
ACIAD0065	FKBP-type 22KD peptidyl-prolyl cis-trans isomerase (rotamase)	↑	0.00291176
ACIAD0682	putative esterase	↑	0.00234454
ACIAD3281	2%2C5-diketo-D-gluconate reductase	↑	0.00350481
ACIAD0636	tryptophan synthase beta chain	↑	0.000745972
ACIAD2386	ribonucleoside hydrolase	↑	0.00423863
ACIAD0742	NADH dehydrogenase I chain M%2C membrane subunit	↑	0.0023832
ACIAD0738	NADH dehydrogenase I chain I%2C 2Fe-2S ferredoxin-related	↑	0.00246173
ACIAD3040	integration host factor (IHF)%2C alpha subunit%2C DNA-binding protein%2C DNA replication	↑	0.00346843
ACIAD0733	NADH dehydrogenase I chain C%2CD	↑	0.00205936
ACIAD2087	putative PLP-dependent aminotransferase	↑	0.00195583
ACIAD2295	conserved hypothetical protein%3B putative oxidoreductase related to nitroreductase	↑	0.00439247
ACIAD3343	conserved hypothetical protein	↑	0.00151582
ACIAD0743	NADH dehydrogenase I chain N	↑	0.00325044
ACIAD2590	4-amino-4-deoxychorismate lyase	↑	0.00266107
ACIAD0305	50S ribosomal protein L10	↑	0.000499578
ACIAD0416	magnesium and cobalt efflux protein	↑	0.0011237
ACIAD0875	bifunctional protein [Includes: hydroxy-methylpyrimidine kinase and hydroxy-phosphomethylpyrimidine kinase]	↑	0.00388199
ACIAD1925	fructose-1%2C6-bisphosphate aldolase%2C class II	↑	0.00376003
ACIAD0015	putative 5'-nucleotidase NucA precursor	↑	0.00237416
ACIAD3517	UDP-N-acetylglucosamine:N-acetylmuramyl-(pentapeptide) pyrophosphoryl-undecaprenol	↑	0.00438643
ACIAD3010	4-hydroxythreonine-4-phosphate dehydrogenase (4-(phosphohydroxy)-L-threonine dehydrogenase)	↑	0.0025819
ACIAD2860	carbamoyl-phosphate synthase%2C small chain	↑	0.0039373
ACIAD0730	NADH dehydrogenase I chain A	↑	0.0027041
ACIAD3009	S-adenosylmethionine-6-N'%2CN'-adenosyl (rRNA) dimethyltransferase%2C kasugamycin resistance	↑	0.00135886
ACIAD2633	putative permease (PerM family)	↑	0.0032462
ACIAD3525	orotate phosphoribosyltransferase	↑	0.00110678
ACIAD3046	50S ribosomal protein L20%2C also posttranslational autoregulator	↑	0.00252907
ACIAD0704	mechanosensitive channel	↑	0.00166333
ACIAD2911	aspartate 1-decarboxylase precursor	↑	0.00321407
ACIAD0212	conserved hypothetical protein	↑	0.00196376
ACIAD0239	inorganic pyrophosphatase	↑	0.00132672
ACIAD3325	RNA polymerase%2C omega subunit	↑	0.00336664
ACIAD0635	N-(5'-phosphoribosyl)anthranilate isomerase (PRAI)	↑	0.00318395
ACIAD3342	conserved hypothetical protein%3B putative biotin carboxylase	↑	0.00167921
ACIAD2210	50S ribosomal protein L31	↑	0.00263651
ACIAD2843	hypothetical protein%3B putative signal peptide	↑	0.00169993
ACIAD3220	30S ribosomal protein S10	↑	0.00236596
ACIAD0590	queuine tRNA-ribosyltransferase (tRNA-guanine transglycosylase) (Guanine insertion enzyme)	↑	0.00202944
ACIAD0503	coniferyl aldehyde dehydrogenase (CALDH)	↑	0.00356558
ACIAD3399	putative peptide synthetase	↓	0.0039535
ACIAD3524	conserved hypothetical protein	↓	0.000406017
ACIAD2278	putative 4-carboxymuconolactone decarboxylase	↓	0.000851465
ACIAD1931	putative magnesium citrate secondary transporter	↓	0.00196889
ACIAD2121	conserved hypothetical protein	↓	0.00387097
ACIAD1714	3-dehydroshikimate dehydratase (DHS dehydratase) (DHSase)	↓	0.00250349
ACIAD2284	conserved hypothetical protein	↓	0.00239708
ACIAD2767	putative siderophore biosynthesis protein%3B putative acetyltransferase	↓	0.00222463
ACIAD0789	type IV pilus biogenesis protein	↓	0.00337672
ACIAD1790	hypothetical protein	↓	0.00152252
ACIAD2630	putative outer membrane protein A	↓	0.000751699
ACIAD1780	putative tonB-dependent ferric siderophore receptor protein	↓	0.00116285
ACIAD1160	putative membrane channel protein	↓	0.0018008
ACIAD1961	conserved hypothetical protein	↓	0.000790632
ACIAD1609	putative enoyl-CoA hydratase/isomerase family protein	↓	0.00274958
ACIAD1510	putative acyl-CoA dehydrogenase%2C putative desulfurization enzyme C (dibenzothiophene)	↓	0.00143385
ACIAD1881	putative phospholipase D protein	↓	0.00377672
ACIAD1163	putative ferric siderophore receptor protein	↓	0.00377205
ACIAD1700	acyl-CoA dehydrogenase	↓	0.000827859
ACIAD1960	conserved hypothetical protein	↓	0.00013871
ACIAD3432	putative type I restriction-modification system DNA methylase (HsdM)	↓	0.0005919
ACIAD1875	putative transcriptional regulator (AraC family)	↓	0.00243434
ACIAD2115	hypothetical protein	↓	0.000871548
ACIAD1959	conserved hypothetical protein	↓	0.000297576
ACIAD2672	putative transcriptional regulator	↓	0.00218119
ACIAD2354	general secretion pathway protein K	↓	0.0029327
ACIAD3421	putative outer membrane protein precursor	↓	0.000698577
ACIAD1576	putative transcriptional regulator (AraC family)	↓	0.00235205
ACIAD2088	glutaminase-asparaginase	↓	0.00205414
ACIAD0666	putative pilus subunit (FilA)	↓	0.00167691
ACIAD0126	D-galactarate dehydratase	↓	0.00444479
ACIAD2522	putative transcriptional regulator	↓	0.0038052
ACIAD3308	lipase chaperone (Lipase foldase) (Lipase helper protein) (Lipase activator protein) (Lipase modulator)	↓	0.00274736
ACIAD0947	conserved hypothetical protein	↓	0.000285254
ACIAD1920	glutaminyl-tRNA synthetase	↓	0.00055539
ACIAD0152	conserved hypothetical protein	↓	0.000928309
ACIAD1864	putative transcriptional regulator (TetR family)	↓	0.00382149
ACIAD3167	tryptophan repressor binding protein	↓	0.00138842
ACIAD1888	putative oxydoreductase related to nitroreductase	↓	0.000631088
ACIAD0166	NAD-linked malate dehydrogenase%2C Rossman fold	↓	0.00382949
ACIAD1610	putative transcriptional regulator (AraC family)	↓	0.00280067
ACIAD1779	membrane bound regulator in multi-component regulatory system with cytoplasmic FecI (sigma factor) and FecA (outer membrane receptor)	↓	0.0001368
ACIAD1574	hypothetical protein	↓	0.000318122
ACIAD0081	putative glycosyl transferase family 1	↓	0.000355734
ACIAD0471	conserved hypothetical protein	↓	0.00206707
ACIAD0856	adenosylmethionine-8-amino-7-oxononanoate aminotransferase	↓	4.38e-05
ACIAD3437	hypothetical protein	↓	0.000120557
ACIAD2201	conserved hypothetical protein%3B putative membrane protein	↓	0.000669142
ACIAD1208	putative fatty acid desaturase	↓	0.000989464
ACIAD0017	putative glutathione S-transferase	↓	0.000904283
ACIAD0118	APC family%2C D-serine/D-alanine/glycine transport protein	↓	0.00305115
ACIAD2422	conserved hypothetical protein	↓	0.00010529
ACIAD1575	linalool 8-monooxygenase (Cytochrome P450 111) (Cytochrome P450lin)	↓	0.000199819
ACIAD0446	conserved hypothetical protein%3B putative membrane protein	↓	0.00228377
ACIAD2992	conserved hypothetical protein	↓	0.00255654
ACIAD3295	modulator of drug activity%2C similar to electron transfer flavoprotein-NAD/FAD/quinone oxidoreductase	↓	0.00287527
ACIAD0754	conserved hypothetical protein	↓	0.00361171
ACIAD2955	conserved hypothetical protein%3B putative DnaJ domain protein	↓	0.00157127
ACIAD1240	putative ferric siderophore receptor protein	↓	0.00120648
ACIAD0639	conserved hypothetical protein	↓	0.000389106
ACIAD1615	nitrile hydratase subunit beta (Nitrilase) (NHase)	↓	0.00105828
ACIAD0143	conserved hypothetical protein%3B putative membrane protein	↓	0.000599287
ACIAD1811	putative transcriptional regulator (MarR/EmrR family)	↓	0.002005
ACIAD2770	2%2C3-dihydroxybenzoate-AMP ligase	↓	4.26e-06
ACIAD1649	SSS family%2C major sodium/proline symporter	↓	0.00212072
ACIAD0687	copper resistance protein A precursor	↓	3.17e-05
ACIAD3081	putative membrane protein	↓	0.0024129
ACIAD1480	hypothetical protein	↓	0.00257271
ACIAD1517	conserved hypothetical protein%3B putative signal peptide	↓	0.0014917
ACIAD3430	putative type I restriction-modification system (HsdR)	↓	1.88e-06
ACIAD3317	putative type 4 fimbrial biogenesis protein (PilX)	↓	0.00044026
ACIAD1339	putative glutamate symport transmembrane protein	↓	0.00155362
ACIAD0243	conserved hypothetical protein	↓	0.000156098
ACIAD0127	D-glucarate/D-galactarate permease (MFS superfamily)	↓	1.89e-05
ACIAD2818	citrate transporter	↓	0.00127471
ACIAD3431	putative type I restriction-modification system specificity determinant for hsdM and hsdR (HsdS)	↓	0.000192977
ACIAD1784	conserved hypothetical protein%3B putative membrane protein	↓	0.00128194
ACIAD1616	nitrile hydratase subunit alpha (Nitrilase) (NHase)	↓	0.000812279
ACIAD3048	putative transporter	↓	0.000117087
ACIAD0850	hypothetical protein%3B putative signal peptide	↓	0.000845753
ACIAD0169	hypothetical protein%3B putative signal peptide	↓	0.000786072
ACIAD0811	putative chromate transport protein	↓	0.00358842
ACIAD3318	pilin like competence factor (comA)	↓	3.29e-06
ACIAD2061	glutamate/aspartate transport protein (ABC superfamily%2C peri_bind)	↓	0.000222522
ACIAD2059	glutamate/aspartate transport protein (ABC superfamily%2C membrane)	↓	2.17e-05
ACIAD0605	putative glycosyl transferase	↓	0.00442001
ACIAD0665	p-aminobenzoate synthetase	↓	7.09e-05
ACIAD3333	conserved hypothetical protein%3B putative lipoprotein signal peptide	↓	0.00433369
ACIAD2865	conserved hypothetical protein%3B putative universal stress protein	↓	0.0003268
ACIAD2768	putative ornithine decarboxylase	↓	3.36e-05
ACIAD2596	sulfate permease A protein%2C chromate resistance (ABC superfamily%2C atp_bind)	↓	0.00255686
ACIAD1425	transcriptional regulator (LysR family)	↓	0.00437593
ACIAD0777	conserved hypothetical protein%3B putative signal peptide	↓	1.02e-05
ACIAD2054	conserved hypothetical protein%3B putative protein (DcaP-like)	↓	0.00121703
ACIAD1862	hypothetical protein	↓	2.69e-05
ACIAD3617	putative transport protein (MFS superfamily)	↓	0.00128415
ACIAD0496	putative RNA-binding protein	↓	0.00206792
ACIAD1572	putative acyl-CoA ligase	↓	4.79e-05
ACIAD3419	hypothetical protein	↓	7.48e-07
ACIAD0779	hypothetical protein	↓	2.1e-05
ACIAD2821	conserved hypothetical protein%3B putative acyl-CoA transferase/carnitine dehydratase	↓	4.7e-05
ACIAD1622	putative transcriptional regulator (AraC family) (nitrilase regulator)	↓	0.000765604
ACIAD0085	putative glycosyl transferase family 2	↓	0.000285032
ACIAD2513	acetoacetyl-CoA transferase%2C alpha subunit	↓	0.00121169
ACIAD2119	hypothetical protein	↓	0.000172831
ACIAD2987	conserved hypothetical protein%3B putative kinase	↓	0.0044611
ACIAD0084	putative glycosyl transferase family 1 (mannosyl transferase)	↓	5.91e-07
ACIAD1646	bifunctional protein [Includes: proline dehydrogenase (Proline oxidase)%3B delta-1-pyrroline-5-carboxylate dehydrogenase (P5C dehydrogenase)]	↓	0.000526082
ACIAD0136	putative xanthine/uracil permease	↓	6.84e-06
ACIAD0057	fragment of transposase (part 1)	↓	0.00137517
ACIAD0669	putative pilus assembly protein (FilD)	↓	0.00120686
ACIAD1850	hypothetical protein%3B putative signal peptide	↓	0.00241962
ACIAD1861	hypothetical protein%3B putative signal peptide	↓	0.00241962
ACIAD0778	conserved hypothetical protein%3B putative signal peptide	↓	0.000151451
ACIAD0668	putative pilus assembly protein (FilC)	↓	0.000215113
ACIAD1292	conserved hypothetical protein	↓	0.00181066
ACIAD1747	putative transcriptionnal regulator (MarR family)	↓	0.000431887
ACIAD1559	putative transcriptional regulator (MarR family)	↓	0.00184585
ACIAD2595	sulfate transport protein (ABC superfamily%2C membrane)	↓	0.00118768
ACIAD2822	putative transport protein (MFS superfamily)	↓	4.22e-05
ACIAD1097	hypothetical protein	↓	1.28e-05
ACIAD2517	Acetyl-/propionyl-coenzyme A carboxylase alpha chain [Includes: Biotin carboxylase %3B Biotin carboxyl carrier protein (BCCP)]	↓	0.000132503
ACIAD1618	amidase	↓	3.08e-06
ACIAD2058	glutamate/aspartate transport protein (ABC superfamily%2C membrane)	↓	0.00191064
ACIAD2333	putative transcriptional repressor of for multidrug resistance pump (MarR family)	↓	0.00428806
ACIAD0053	hypothetical protein%3B putative zinc protease	↓	0.00128127
ACIAD1527	putative FMNH2-dependent methane/alkanesulfonate monooxygenase	↓	0.00135341
ACIAD0106	L-lactate permease	↓	0.000236482
ACIAD2802	hypothetical protein	↓	0.000137361
ACIAD0545	thermoresistant gluconokinase (Gluconate kinase)	↓	0.000333084
ACIAD3616	aldehyde reductase	↓	0.000284766
ACIAD2805	hypothetical protein	↓	0.000669319
ACIAD1717	putative regulatory protein (PobS)	↓	0.00121012
ACIAD2977	potassium-transporting ATPase B chain	↓	0.00166229
ACIAD2518	putative allophanate hydrolase subunit 1 and 2	↓	0.000170398
ACIAD0082	putative glycosyl transferase family 2 (rhamnosyl transferase)	↓	3.05e-05
ACIAD2520	putative lactam utilization protein	↓	3.32e-05
ACIAD2180	hypothetical protein	↓	0.00109065
ACIAD0543	bifunctional protein [Includes: KHG-aldolase and KDPG-aldolase]	↓	1.7e-06
ACIAD3436	conserved hypothetical protein	↓	6.56e-06
ACIAD2824	conserved hypothetical protein%3B putative protein (DcaP-like)	↓	8.14e-08
ACIAD2594	sulfate transport protein (ABC superfamily%2C membrane)	↓	0.000115741
ACIAD3415	hypothetical protein	↓	0.000140715
ACIAD0542	phosphogluconate dehydratase (6-phosphogluconate dehydratase)	↓	9.07e-10
ACIAD0544	high-affinity gluconate permease (GntP family)	↓	5.77e-06
ACIAD2519	conserved hypothetical protein	↓	5.9e-05
ACIAD1114	hypothetical protein	↓	0.000110816
ACIAD1746	hypothetical protein	↓	0.000424457
ACIAD2825	fragment of transcription elongation factor (GreB-like) (part 1)	↓	0.00130252
ACIAD2978	potassium-transporting ATPase A chain	↓	3.55e-05
ACIAD2521	conserved hypothetical protein%3B putative membrane protein	↓	9.45e-05
ACIAD0054	hypothetical protein%3B putative fragment of ribosomal protein S3	↓	0.00414218
ACIAD1787	cold shock-like protein	↓	0.000194265
